# Supplementary material for: Technological Response of Wild Macaques (Macaca fascicularis) to Anthropogenic Change
Source: PubMed Central journal article supplement (PMC5629225; doi:10.1007/s10764-017-9985-6), 2017-08-29

Anvil 2 - 3D Model

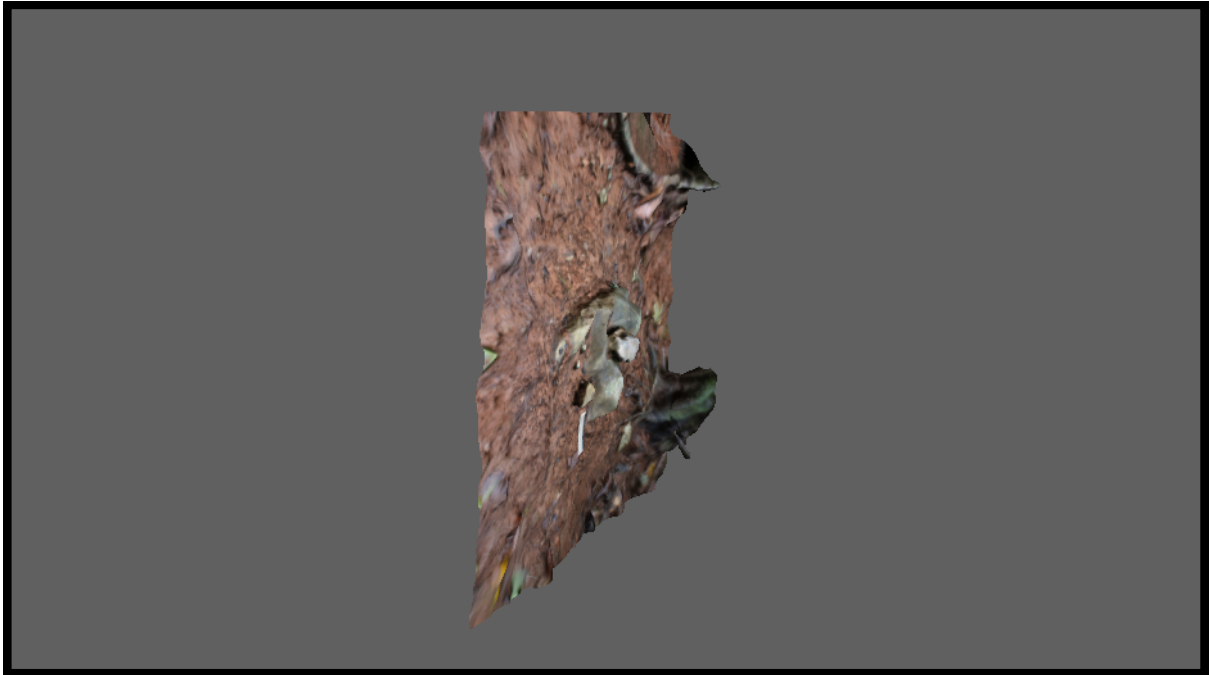

Anvil 2 - 3D Model Video

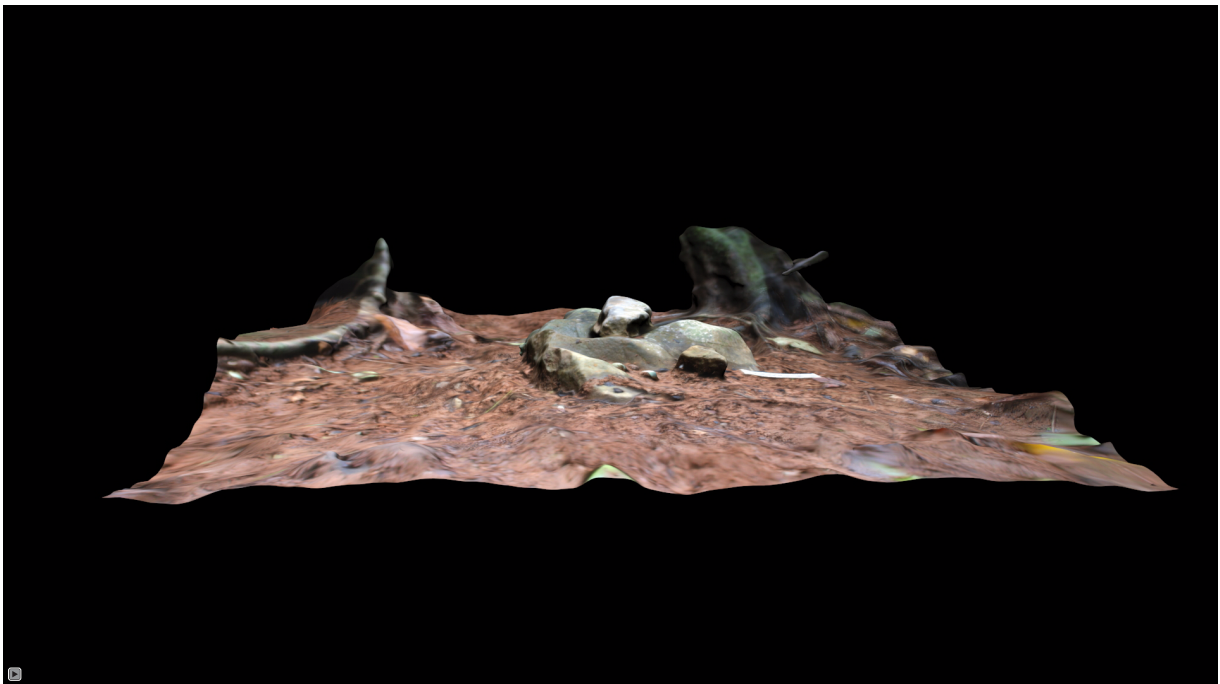

Supplement: 10764_2017_9985_MOESM2_ESM.pdf [file 10764_2017_9985_MOESM2_ESM.pdf]
